# Supplementary material for: Unraveling the genetic diversity of Belgian Milk Sheep using medium‐density SNP genotypes
Source: PubMed Central journal article supplement — Anim Genet. 2019 Dec 27;51(2):258–65. doi: 10.1111/age.12891 (PMC7065072; doi:10.1111/age.12891), 2019-12-27
Supplement: AGE-51-258-s001.pdf [file AGE-51-258-s001.pdf]

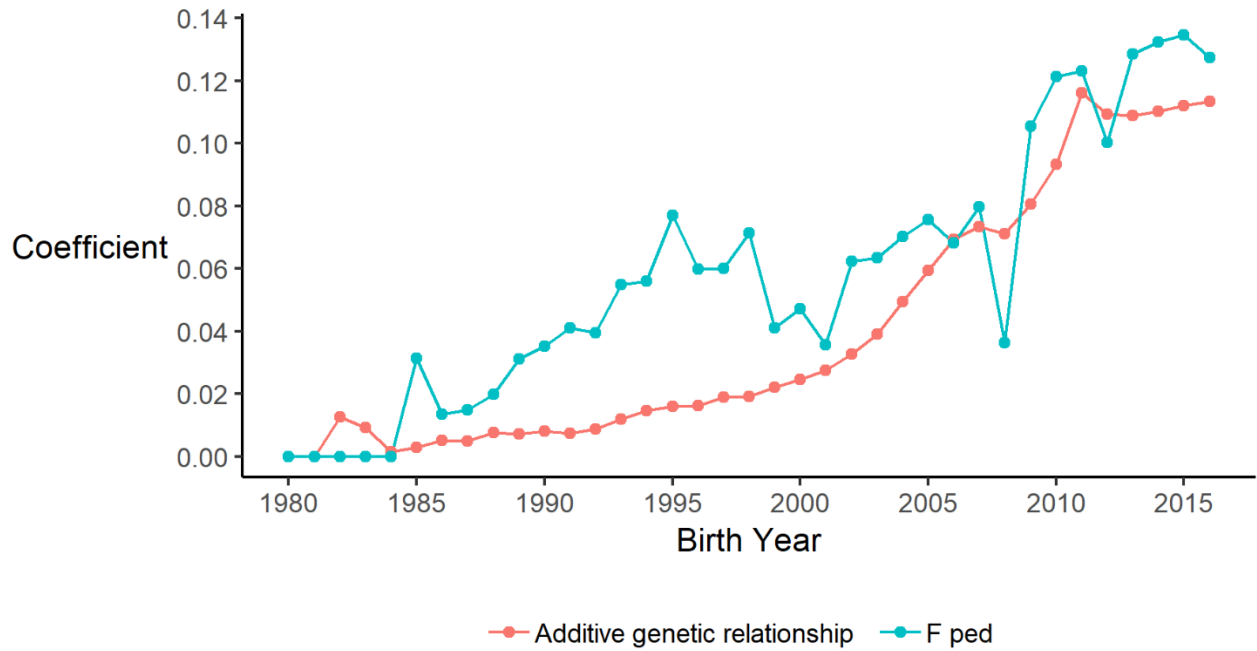

**Figure S1.** Average additive genetic relationship and inbreeding coefficients ( $F_{ped}$ ) by year of birth for Belgian Milk Sheep from 1980 to 2016. The drop of  $F_{ped}$  in 2008 can be attributed to the use of one single ram in the largest flock, coming from another flockbook, of which no progeny was kept for breeding

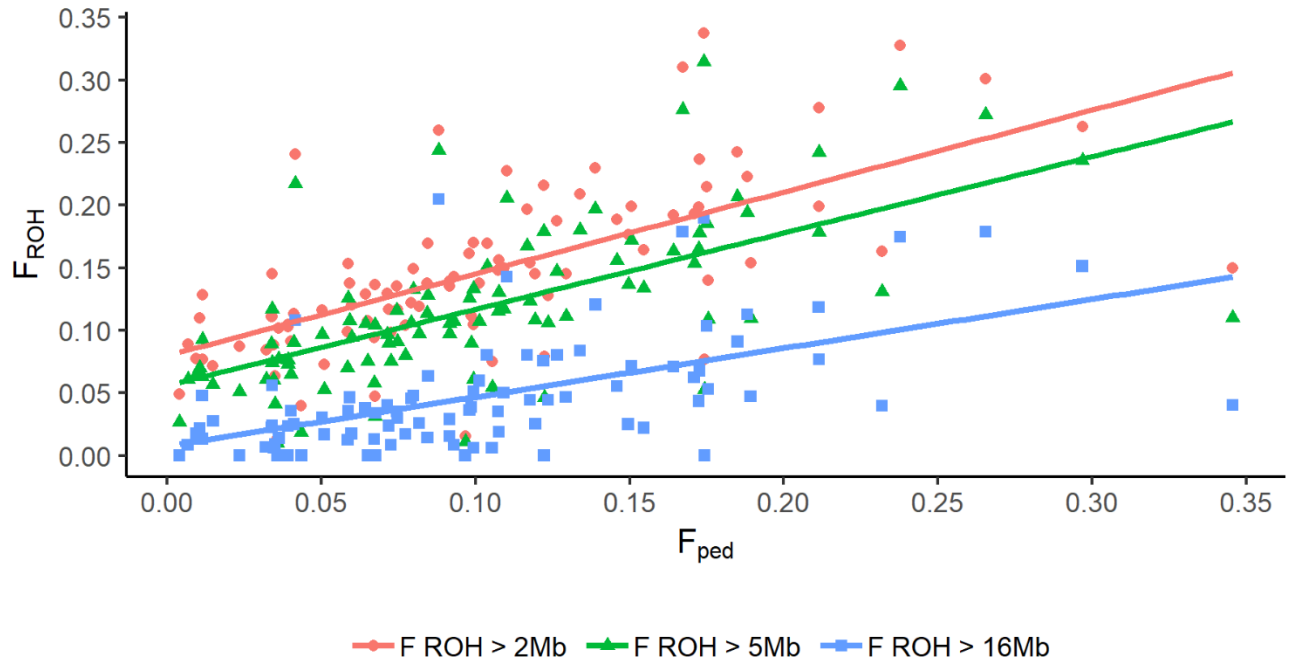

**Figure S2.** Genomic inbreeding coefficients based on ROH ( $F_{ROH}$ ) compared to the estimated inbreeding coefficient based on pedigree data for all 94 genotyped Belgian Milk Sheep.

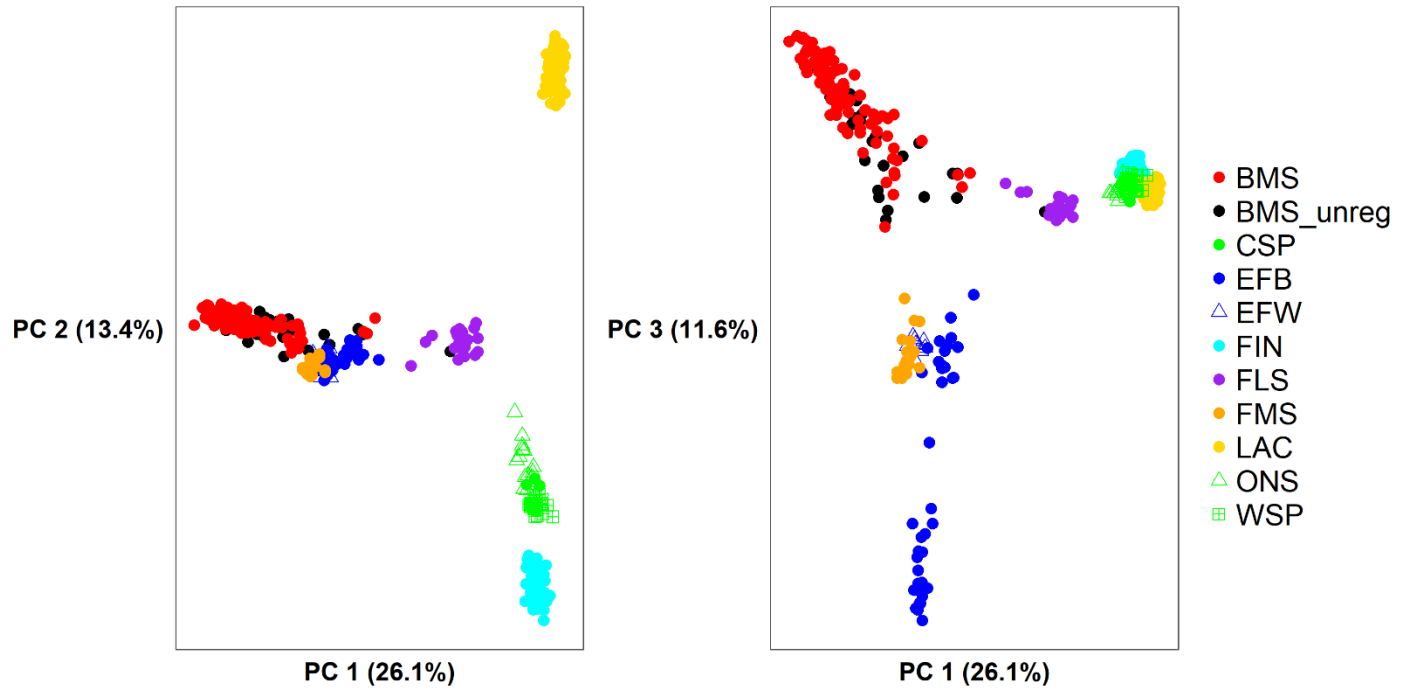

**Figure S3.** The principal component analysis (PC1 and PC2 (left) and PC1 and PC3 (right)) shows that most of the unregistered Belgian Milk Sheep (BMS\_unreg) cluster in the Belgian Milk Sheep group. Breed abbreviations as in Figure 1

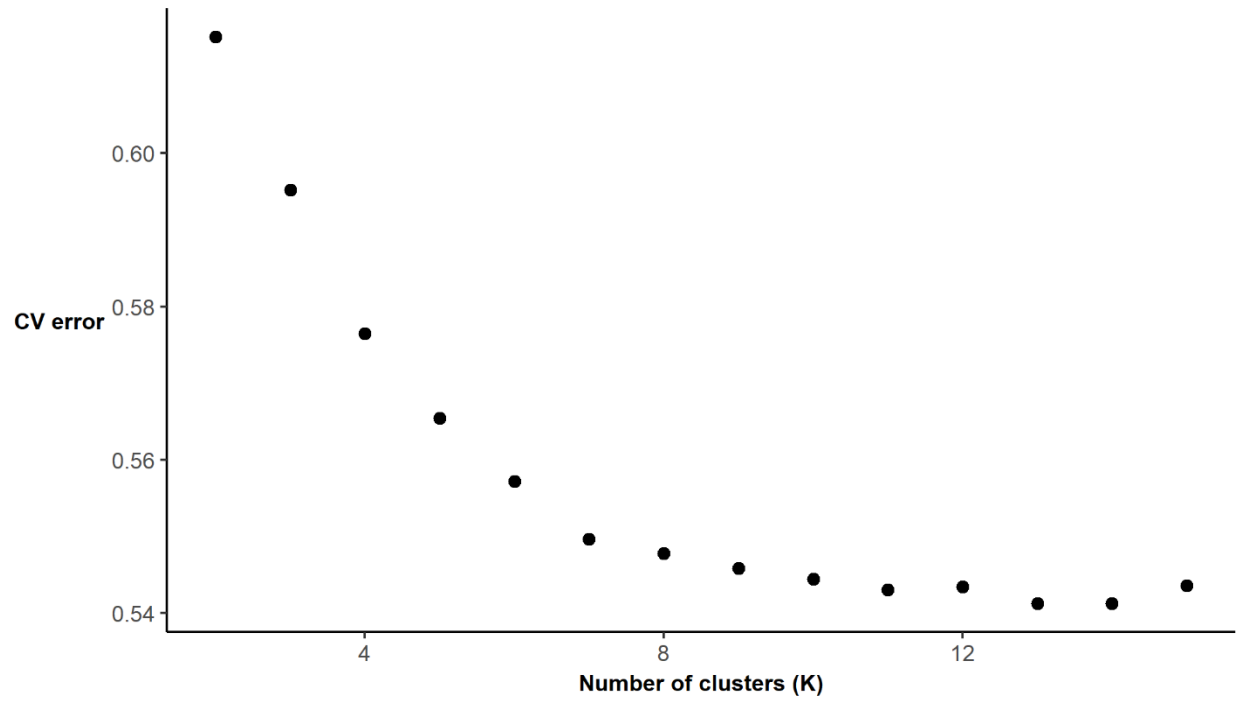

**Figure S4.** 5-fold cross validation errors indicate K = 8 as most likely modelling choice in the ADMIXTURE analysis



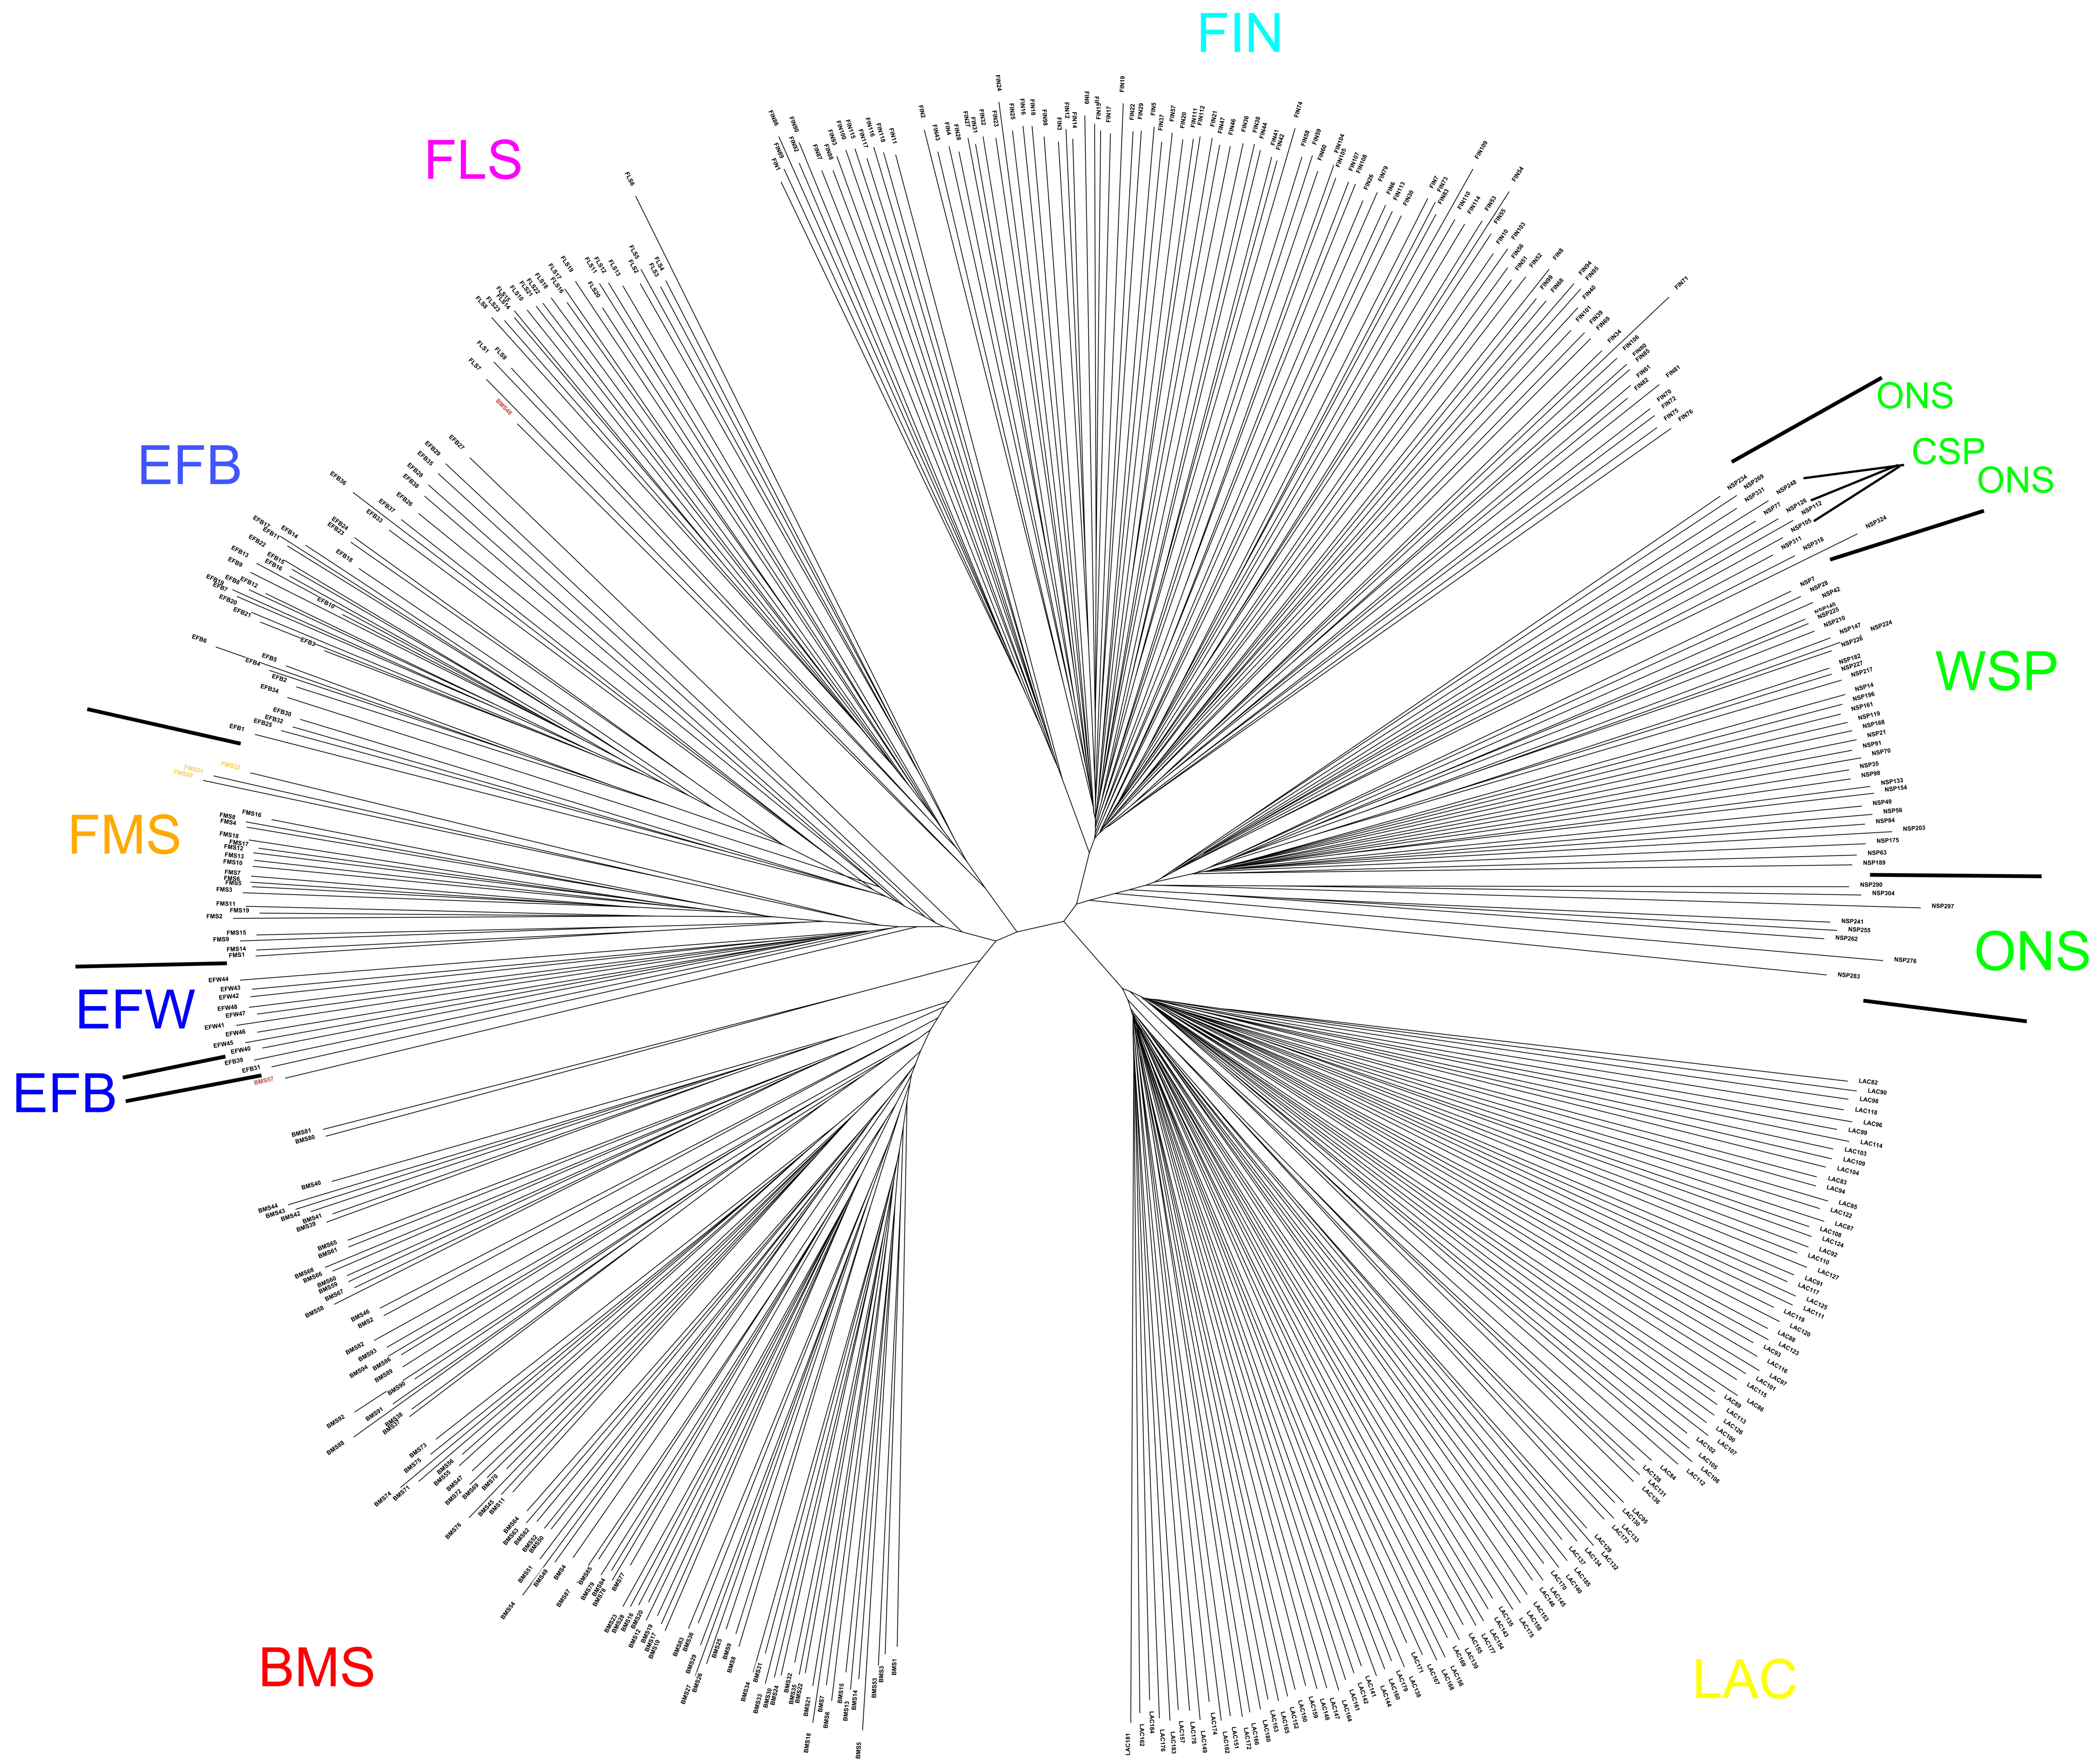

**Figure S5.** The neighbor-joining tree based on allele-sharing distances. Breed abbreviations as in Figure 1. BMS outliers in are indicated in red and FMS outliers in Figure 2 (EFB-like) are in gold.
