# Supplementary material for: Unraveling the genetic diversity of Belgian Milk Sheep using medium‐density SNP genotypes
Source: PubMed Central journal article supplement — Anim Genet. 2019 Dec 27;51(2):258–65. doi: 10.1111/age.12891 (PMC7065072; doi:10.1111/age.12891), 2019-12-27
Supplement: AGE-51-258-s002.pdf [file AGE-51-258-s002.pdf]

**Table S1.** Summary of SNP quality control in Belgian Milk Sheep (BMS), Flemish Sheep (FLS) and Friesian Milk Sheep (FMS)

|                                    | Number of SNPs |       |       |
|------------------------------------|----------------|-------|-------|
|                                    | BMS            | FLS   | FMS   |
| Number of genotyped animals        | 94             | 23    | 22    |
| Total number of SNPs (OvineSNP50)  | 54241          | 54241 | 54241 |
| Call rate (<0.95)                  | 4689           | 4112  | 3986  |
| No chromosomal coordinates         | 342            | 351   | 349   |
| SNPs on sex chromosomes            | 1335           | 899   | 1367  |
| Total removed SNPs                 | 6376           | 5363  | 5706  |
| Total SNPs passing quality control | 47875          | 48879 | 48539 |

**Table S2.** Summary of inbreeding coefficient analysis based on runs of homozygosity (ROH) in the studied breeds, where N is the number of studied individuals, l is the minimal number of SNPs in a ROH, mean  $H_o$  is the mean observed heterozygosity, mean  $H_e$  is the mean expected heterozygosity and mean  $F_{ROH}$  is the mean inbreeding coefficient based on ROH.

| Breed                  |     | N   | l  | Mean $H_o$ | Mean $H_e$ | Mean $F_{IS}$ | Mean $F_{ROH}$ |
|------------------------|-----|-----|----|------------|------------|---------------|----------------|
| Belgian Milk Sheep     | BMS | 94  | 49 | 0.310      | 0.316      | 0.019         | 0.145          |
| Colored Spaelsau       | CSP | 3   | 36 | 0.336      |            |               | 0.084          |
| East-Friesian Brown    | EFB | 39  | 50 | 0.295      | 0.301      | 0.019         | 0.170          |
| East-Friesian White    | EFW | 9   | 42 | 0.317      |            |               | 0.086          |
| Finn Sheep             | FIN | 99  | 43 | 0.346      | 0.357      | 0.032         | 0.056          |
| Flemisch Sheep         | FLS | 23  | 42 | 0.330      | 0.327      | -0.008        | 0.123          |
| Friesian Milk Sheep    | FMS | 22  | 45 | 0.313      | 0.293      | -0.067        | 0.100          |
| Lacaune                | LAC | 103 | 41 | 0.362      | 0.365      | 0.010         | 0.044          |
| Old Norwegian Spaelsau | ONS | 15  | 40 | 0.339      |            |               | 0.090          |
| White Spaelsau         | WSP | 32  | 43 | 0.330      | 0.334      | 0.013         | 0.093          |
